# Supplementary material
Source: Springer Nature journal article supplement (https://www.springermedizin.de/resource/supplementary/12885_2013_5203_MOESM8_ESM.pdf/9466448)

A

|     |   |   |   |   |   |   |   |   |   |   |
|-----|---|---|---|---|---|---|---|---|---|---|
| ATO | - | - | - | - | + | + | + | + | + | + |
| BSO | - | + | - | - | + | + | + | - | - | - |
| NAC | - | - | + | - | - | + | - | - | + | - |
| DTT | - | - | - | + | - | - | + | - | - | + |

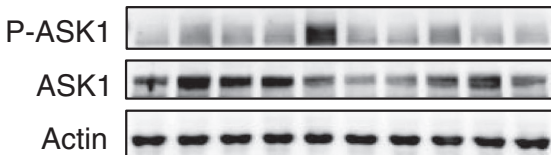

B

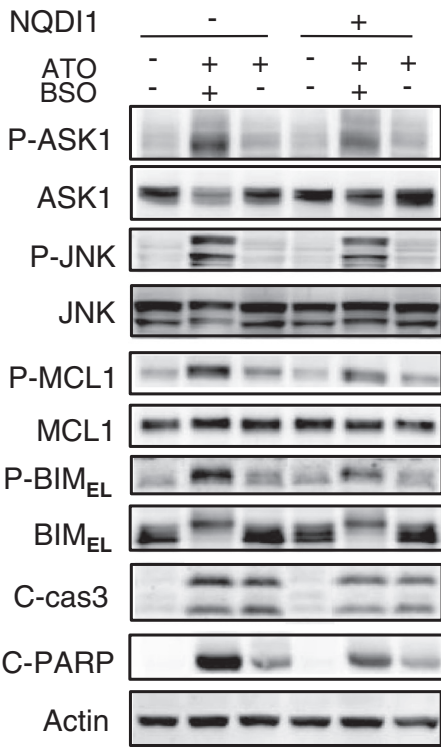

Supplement: MOESM8 [file 9466448]
